# Supplementary material for: Luminescent lanthanide metal–organic frameworks for chemical sensing and toxic anion detection
Source: Royal Society of Chemistry journal article supplement (doi:10.1039/c7dt01790a), 2017-01-01
Supplement: c7dt01790a1.pdf [file c7dt01790a1.pdf]

## Supporting Information

### **Luminescent lanthanide metal-organic frameworks for chemical sensing and toxic anion detection**

*Rui-Zhi Wu, Xing Yang, Liang-Wei Zhang, Pan-Pan Zhou\**

*State Key Laboratory of Applied Organic Chemistry, Key Laboratory of Nonferrous Metal Chemistry and Resources Utilization of Gansu Province, College of Chemistry and Chemical Engineering, Lanzhou University, 222 South Tianshui Road, 730000, Lanzhou, P. R. China.*

*Fax: +86-931-8912582; Tel: +86 931 8912862; \*E-mail: zhoupp@lzu.edu.cn*

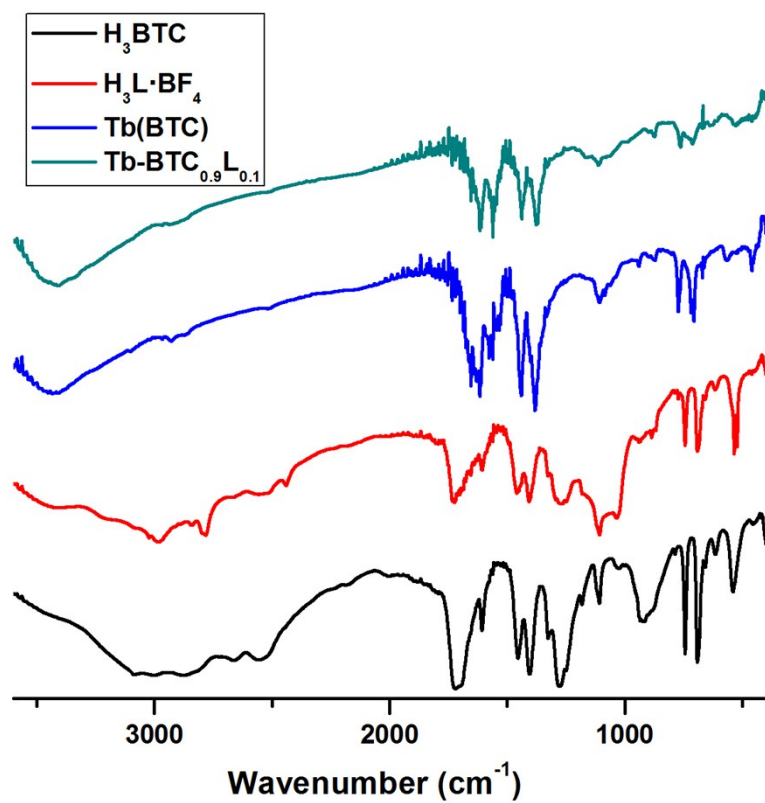

**Fig. S1** FT-IR spectra of H<sub>3</sub>BTC, H<sub>3</sub>L·BF<sub>4</sub>, Tb(BTC) and Tb-BTC<sub>0.9</sub>L<sub>0.1</sub>.

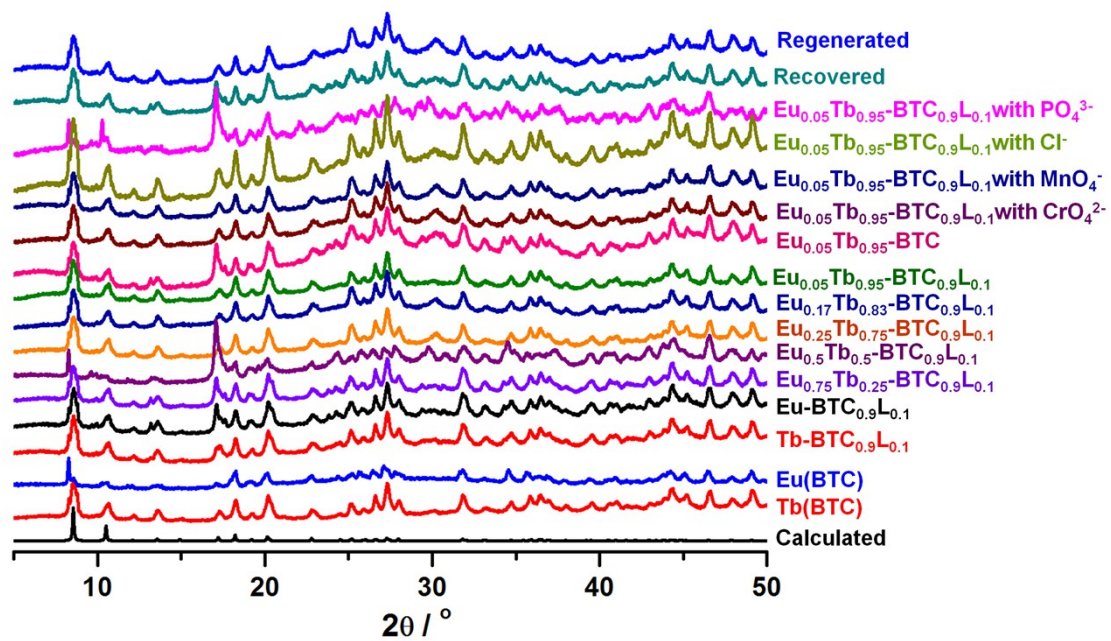

**Fig. S2** PXRD patterns for Ln(BTC) and  $\text{Eu}_x\text{Tb}_{1-x}\text{-BTC}_{0.9}\text{L}_{0.1}$  ( $x=0, 0.05, 0.17, 0.25, 0.5, 0.75, 1$ ).
